# Supplementary material
Source: publisher figshare collection journal article supplement (https://acs.figshare.com/ndownloader/files/4484269)

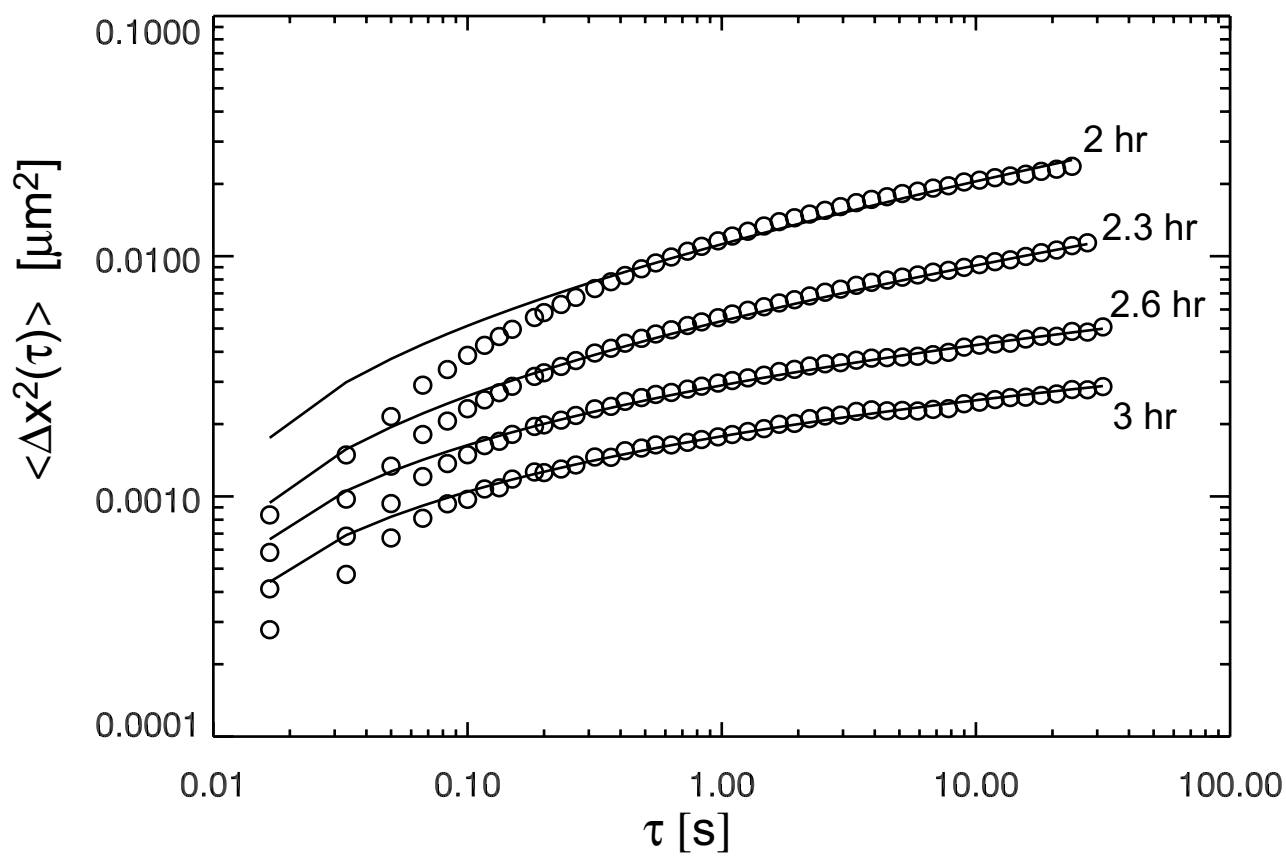

Supplement: Supplementary file 2 [file 4484269]

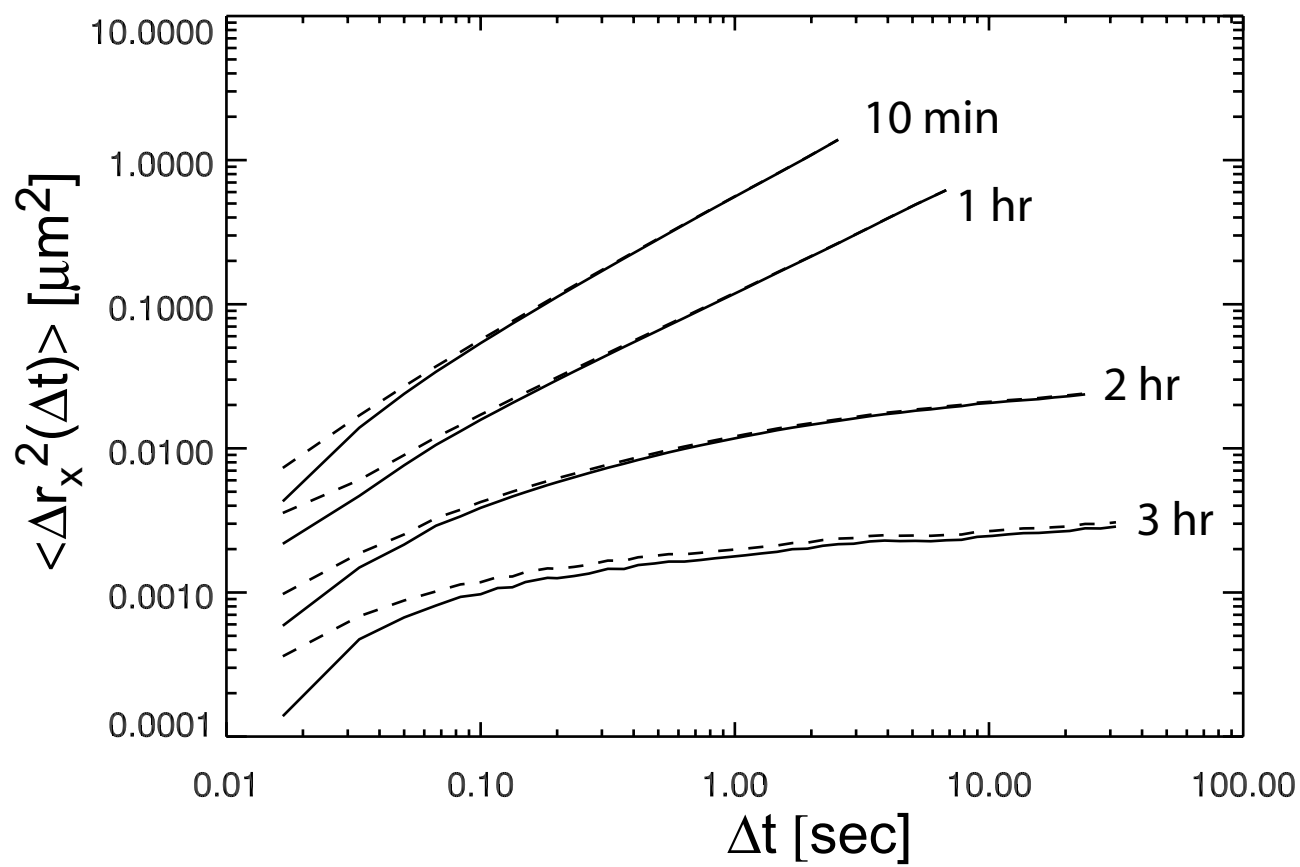

Supplement: Supplementary file 3 [file 4484269]

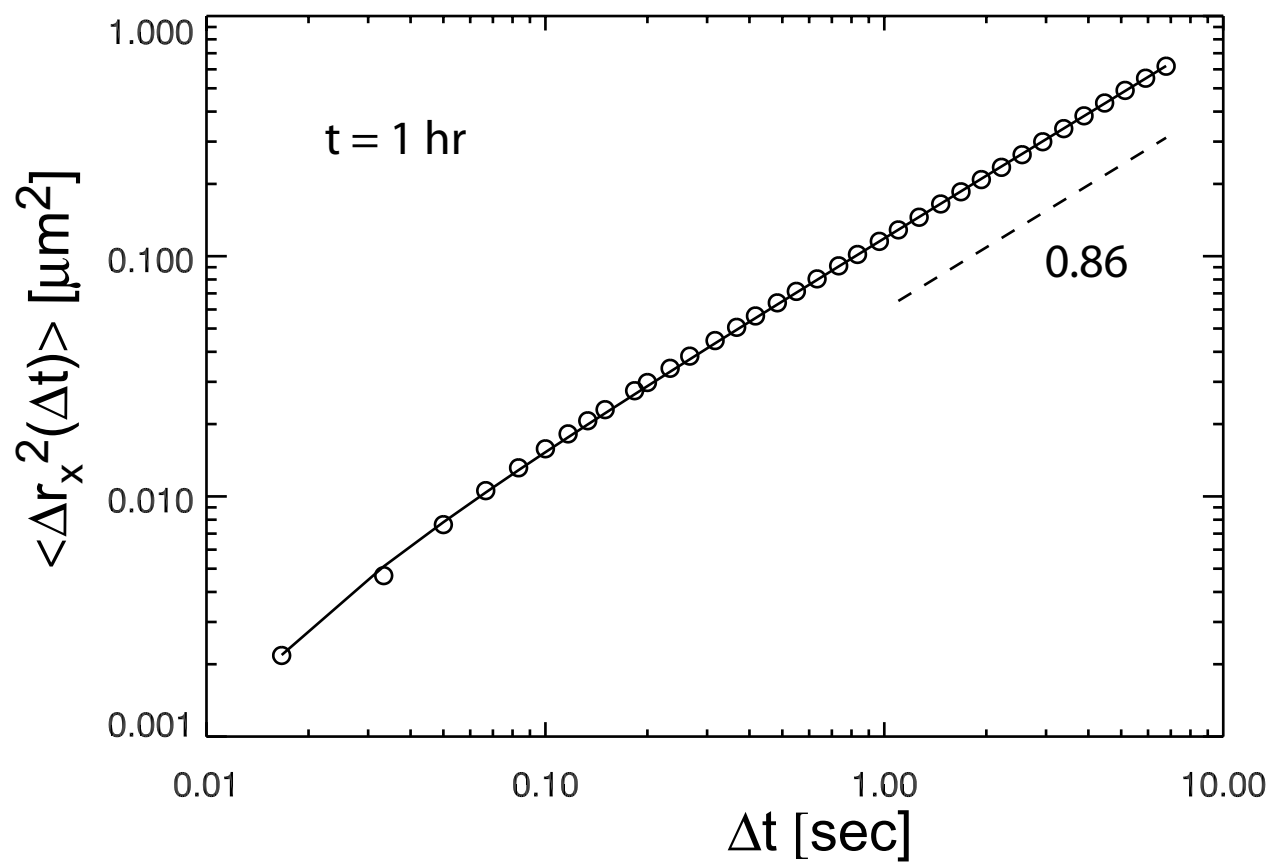

Supplement: Supplementary file 4 [file 4484269]

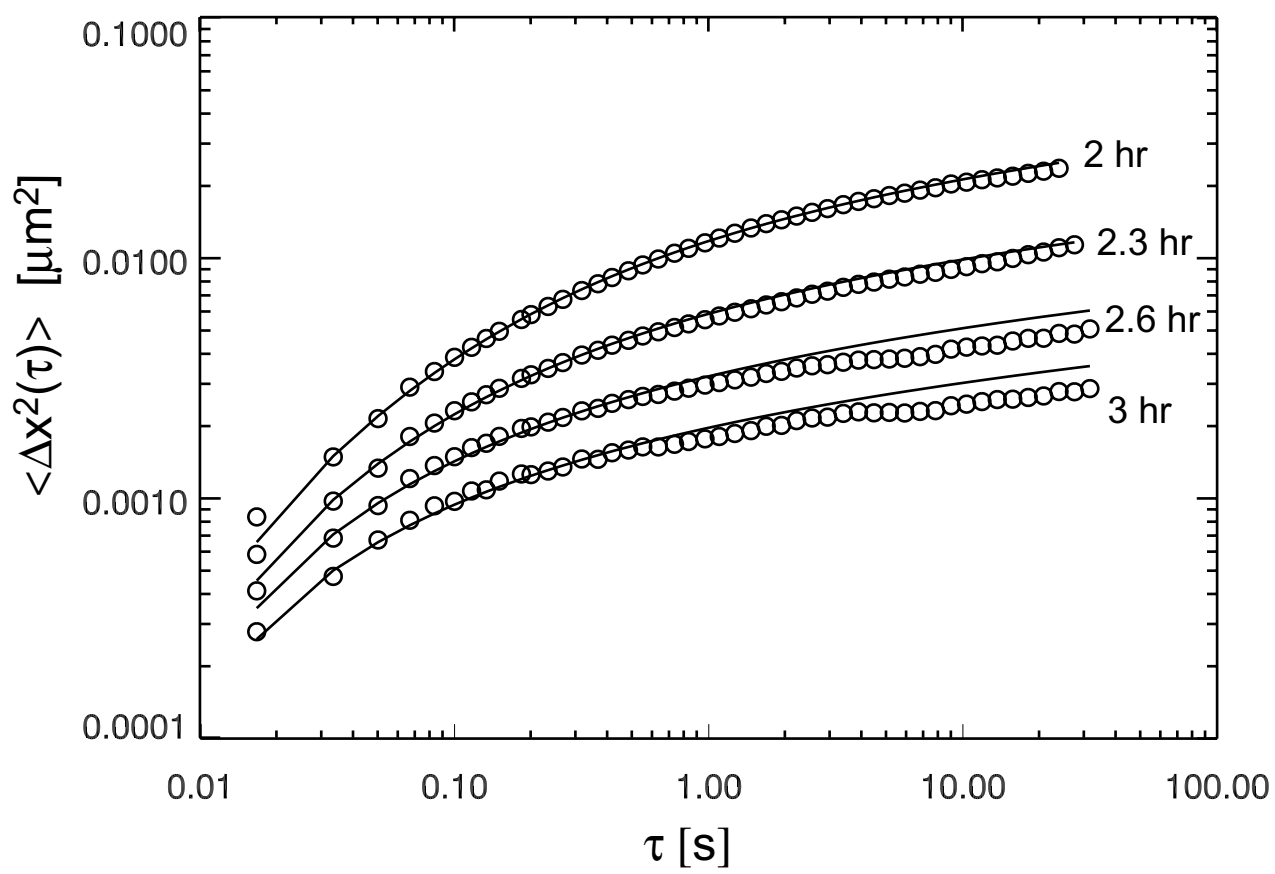

Supplement: Supplementary file 5 [file 4484269]

(A)

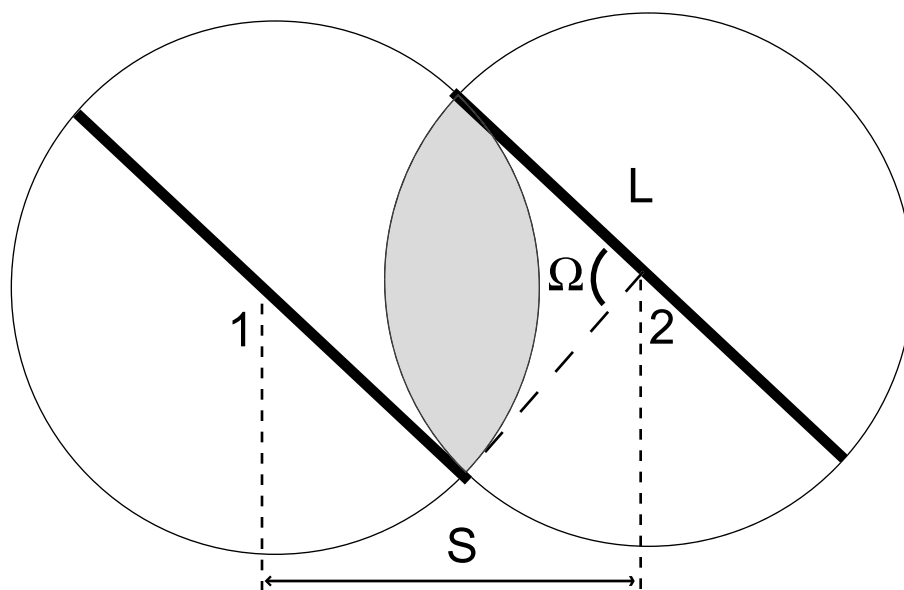

(B)

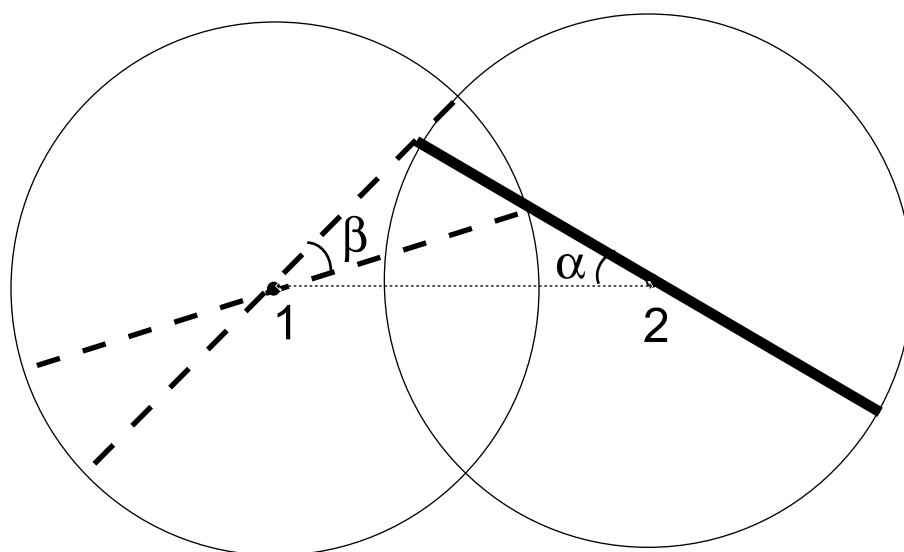

Supplement: Supplementary file 6 [file 4484269]

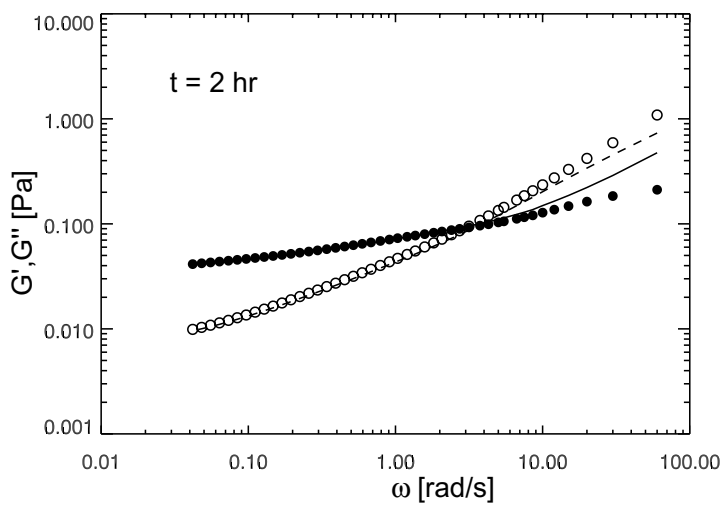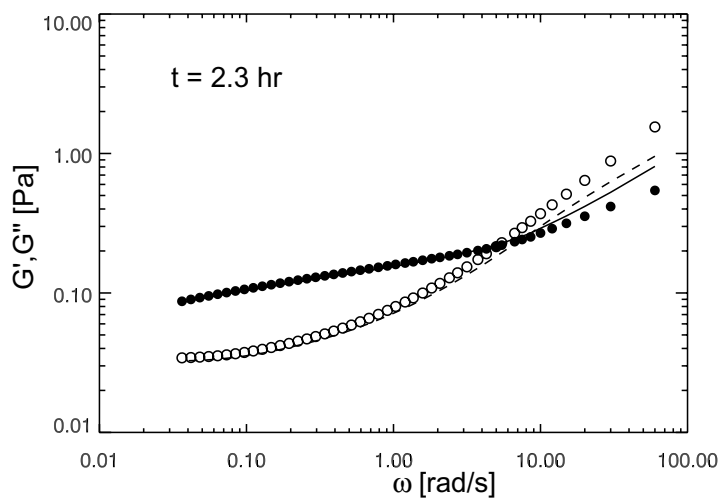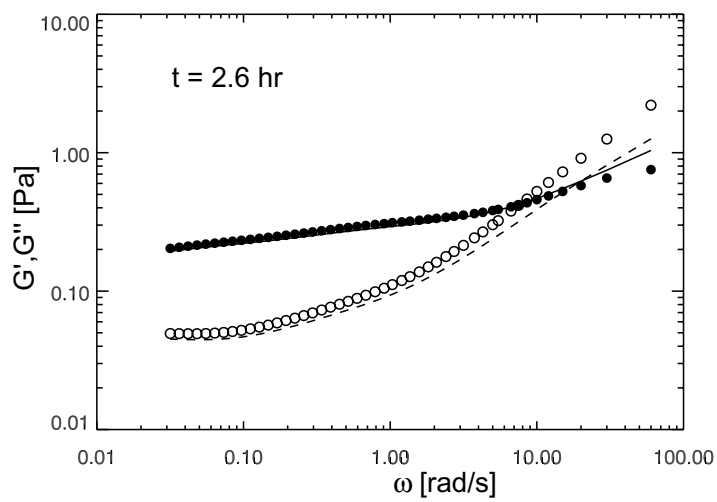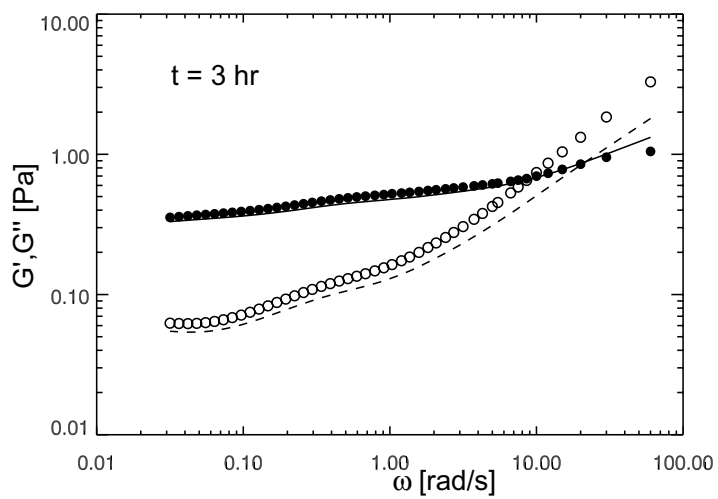

Supplement: Supplementary file 7 [file 4484269]

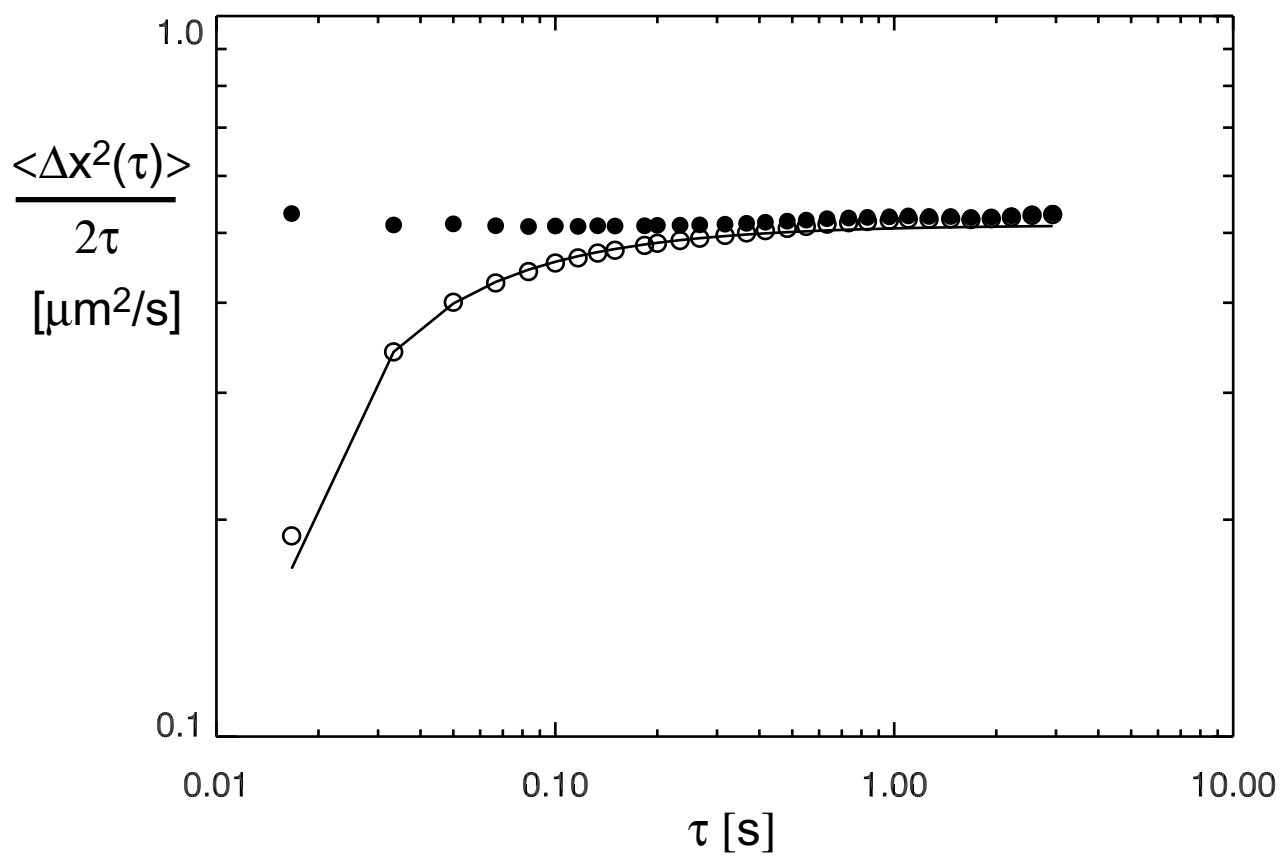

Supplement: Supplementary file 8 [file 4484269]
